# Supplementary material
Source: MDPI journal article supplement (https://www.mdpi.com/1424-8247/16/12/1657)
Supplement: s1 [file s1]

# Development of Potential Multi-Target Inhibitors for Human Cholinesterases and Beta-Secretase 1: A Computational Approach

Deyse B. Barbosa <sup>1</sup>, Mayra R. do Bomfim <sup>1</sup>, Tiago A. de Oliveira <sup>2</sup>, Alisson M. da Silva <sup>3</sup>, Alex G. Taranto <sup>3</sup>, Jorddy N. Cruz <sup>4</sup>, Paulo B. de Carvalho <sup>5</sup>, Joaquín M. Campos <sup>6</sup>, Cleydson B. R. Santos <sup>4,7,\*</sup> and Franco H. A. Leite <sup>1</sup>

<sup>1</sup> Laboratório de Modelagem Molecular, Departamento de Saúde, Universidade Estadual de Feira de Santana, Feira de Santana 44036-900, BA, Brazil; deyse.brito@hotmail.com (D.B.B.); mayramosbonfim@hotmail.com (M.R.d.B.); fhpharm@gmail.com (F.H.A.L.)

<sup>2</sup> Departamento de Informática, Gestão e Desenho, Centro Federal de Educação Tecnológica de Minas Gerais, Divinópolis 30575-180, MG, Brazil; tiago@cefetmg.br

<sup>3</sup> Laboratório de Bioinformática e Desenho de Fármacos, Universidade Federal de São João del-Rei, São João del-Rei 36307-352, MG, Brazil; alisson@cefetmg.br (A.M.d.S.); proftaranto@hotmail.com (A.G.T.)

<sup>4</sup> Laboratório de Modelagem e Química Computacional, Departamento de Ciências Biológicas e de Saúde, Universidade Federal do Amapá, Macapá 68903-419, AP, Brazil; jorddynevescruz@gmail.com

<sup>5</sup> Feik School of Pharmacy, University of the Incarnate Word, San Antonio, TX 78209, USA; pcarvalh@uiwtx.edu

<sup>6</sup> Departamento de Química Orgánica Farmacéutica, Facultad de Farmacia, Campus de la Cartuja, Universidad de Granada, 18012 Granada, Spain; jmcampos@ugr.es

<sup>7</sup> Programa de Pós-Graduação em Biodiversidade e Biotecnologia—Rede BIONORTE, Universidade Federal do Amapá, Macapá 68903-419, AP, Brazil

\* Correspondence: breno@unifap.br

## SUPPLEMENTARY MATERIAL

**Figure S1.** RMSF analysis by means of principal components analysis (PCA) for ZN1733 in complex with AChE (A), BuChE (B), and BACE-1 (C). The blue highlighted area corresponds to regions with more fluctuations.

**Figure S2.** 2D Chemical structures of AChE, BuChE and BACE-1 inhibitors used to build triple pharmacophore models with their biological activity data [90–96]. The data was obtained from published literature and the activity units were kept as presented in the original material.

**Figure S3.** 2D Chemical structures of AChE, BuChE and BACE-1 inhibitors used to pharmacophore model validation and their biological activity data [90–96]. The data was obtained from published literature and the activity units were kept as presented in the original material.

**Figure S1.** RMSF analysis by means of principal components analysis (PCA) for ZN1733 in complex with AChE (A), BuChE (B), and BACE-1 (C). The blue highlighted area corresponds to regions with more fluctuations.

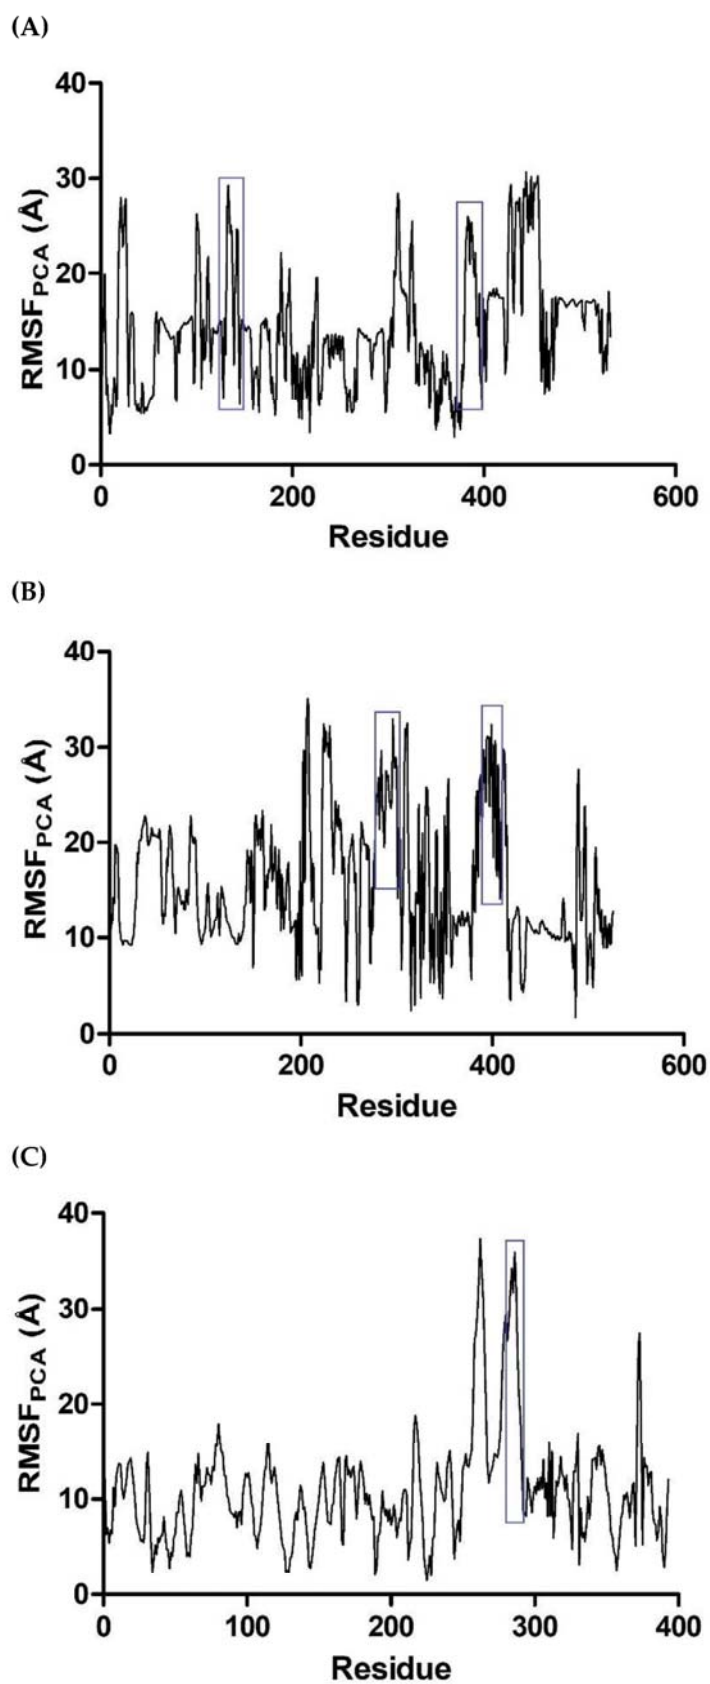

**Figure S2.** 2D Chemical structures of AChE, BuChE and BACE-1 inhibitors used to build triple pharmacophore models with their biological activity data [90–96]. The data was obtained from published literature and the activity units were kept as presented in the original material.

4

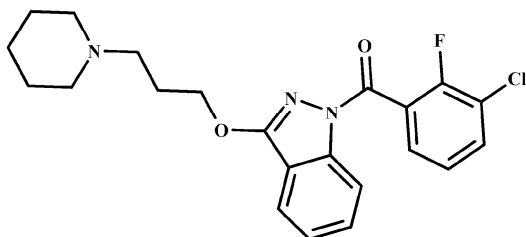

AChE % Inhibition (10  $\mu$ M) = 48

BuChE IC<sub>50</sub> = 0.80  $\pm$  0.04  $\mu$ M

BACE-1 % Inhibition (10  $\mu$ M) = 34  $\pm$  1

9

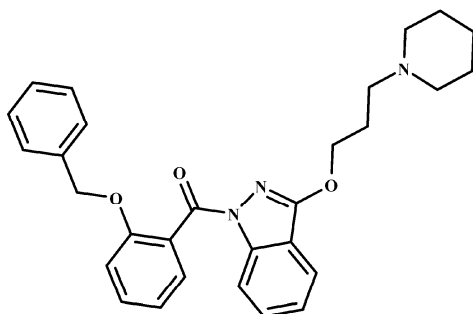

AChE%Inhibition (10  $\mu$ M) = 31

BuChE IC<sub>50</sub> = 2.5  $\pm$  0.001  $\mu$ M

BACE-1%Inhibition(10  $\mu$ M) = 38.4  $\pm$   
1.11

12

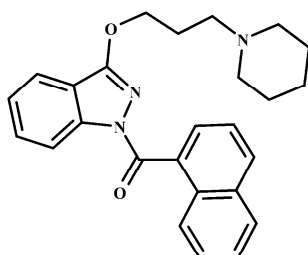

AChE%Inhibition (10  $\mu$ M) = 43

BuChE IC<sub>50</sub> = 0.007  $\mu$ M

BACE-1%Inhibition(10  $\mu$ M) = 42  $\pm$  2

16

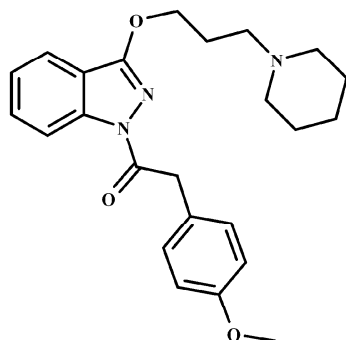

AChE%Inhibition (10  $\mu$ M) = 43

BuChE%%Inhibition (10  $\mu$ M) = 42

BACE-1%Inhibition (10  $\mu$ M) = 60  $\pm$  8

18

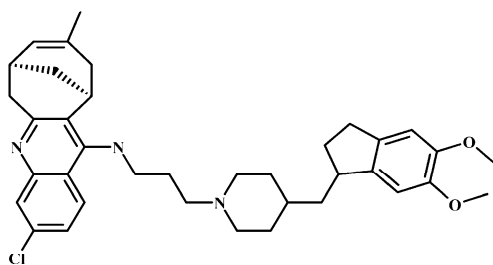

AChE  $IC_{50}$  = 0.003  $\mu$ M  
 BuChE  $IC_{50}$  =  $0.349 \pm 0.02$   $\mu$ M  
 BACE-1%Inhibition(5 $\mu$ M) =  $30,8 \pm 4,1$

28

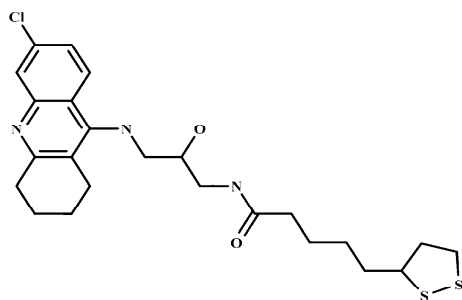

AChE  $IC_{50}$  = 0.04  $\mu$ M  
 BuChE  $IC_{50}$  = 1.03  $\mu$ M  
 BACE-1%Inhibition (10  $\mu$ M) =  $46.78 \pm 3.12$

30

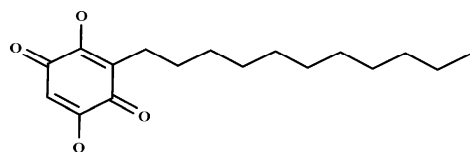

AChE%Inhibition (10  $\mu$ M) = 70.15  
 BuChE%%Inhibition (10  $\mu$ M) = 77.15  
 BACE-1%Inhibition (10  $\mu$ M) =  $77.61 \pm 3.78$

40

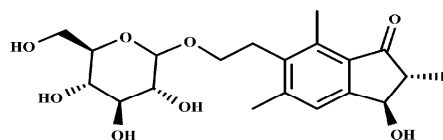

AChE  $IC_{50}$  =  $5.29 \pm 0.82$   $\mu$ M  
 BuChE  $IC_{50}$  =  $3.77 \pm 0.38$   $\mu$ M  
 BACE-1  $IC_{50}$  =  $9.74 \pm 1.9$   $\mu$ M

44

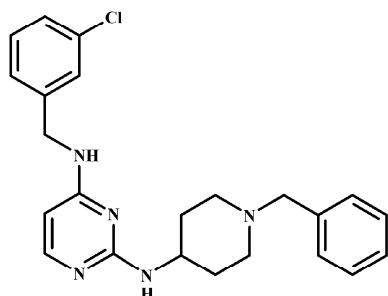

AChE  $IC_{50}$  =  $7.70 \pm 0.77$   $\mu$ M  
 BuChE  $IC_{50}$  =  $2.50 \pm 0.23$   $\mu$ M  
 BACE-1  $IC_{50}$  =  $1.70 \pm 0.15$   $\mu$ M

**Figure S3.** 2D Chemical structures of AChE, BuChE and BACE-1 inhibitors used to pharmacophore model validation and their biological activity data [90–96]. The data was obtained from published literature and the activity units were kept as presented in the original material.

| 1                                                                                                                                                                                                                        | 2                                                                                                                                                                                                                        | 3                                                                                                                                                                                                                         |
|--------------------------------------------------------------------------------------------------------------------------------------------------------------------------------------------------------------------------|--------------------------------------------------------------------------------------------------------------------------------------------------------------------------------------------------------------------------|---------------------------------------------------------------------------------------------------------------------------------------------------------------------------------------------------------------------------|
| 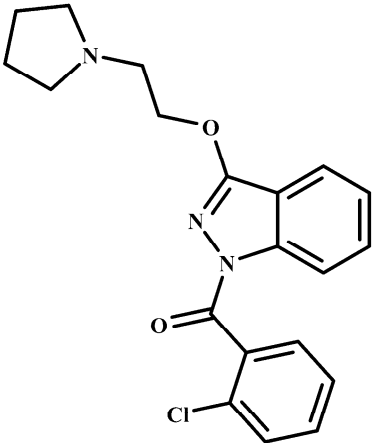 <p> AChE IC<sub>50</sub> = 9.7 ± 0.8 μM<br/> BuChE IC<sub>50</sub> = 1.3 ± 0.5 μM<br/> BACE-1 %Inhibition (10 μM) = 9 ± 3 </p>         |  <p> AChE IC<sub>50</sub> = 9.7 ± 0.3 μM<br/> BuChE IC<sub>50</sub> = 0.07 ± 0.01 μM<br/> BACE-1 %Inhibition (10 μM) = 12 ± 4 </p>      |  <p> AChE IC<sub>50</sub> = 11 ± 1 μM<br/> BuChE IC<sub>50</sub> = 11 ± 1 μM<br/> BACE-1 %Inhibition (10 μM) = 14 ± 2 </p>             |
| 5                                                                                                                                                                                                                        | 6                                                                                                                                                                                                                        | 7                                                                                                                                                                                                                         |
|  <p> AChE IC<sub>50</sub> = 10.5 ± 0.5 μM<br/> BuChE IC<sub>50</sub> = 0.6 ± 0.3 μM<br/> BACE-1 %Inhibition (10 μM) = 18.1 ± 0.4 </p> |  <p> AChE IC<sub>50</sub> = 17 ± 2 μM<br/> BuChE IC<sub>50</sub> = 0.080 ± 0.003 μM<br/> BACE-1 %Inhibition (10 μM) = 45.1 ± 0.9 </p> |  <p> AChE IC<sub>50</sub> = 9.4 ± 0.6 μM<br/> BuChE IC<sub>50</sub> = 9.4 ± 0.2 μM<br/> BACE-1 %Inhibition (10 μM) = 14.3 ± 0.9 </p> |

| 8                                                                                                                                                                                                                    | 10                                                                                                                                                                                                                              | 11                                                                                                                                                                                                                                |
|----------------------------------------------------------------------------------------------------------------------------------------------------------------------------------------------------------------------|---------------------------------------------------------------------------------------------------------------------------------------------------------------------------------------------------------------------------------|-----------------------------------------------------------------------------------------------------------------------------------------------------------------------------------------------------------------------------------|
| 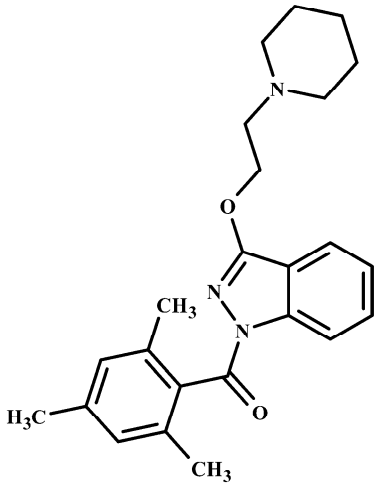 <p> AChE IC<sub>50</sub> = 11.6 ± 0.7 μM<br/> BuChE IC<sub>50</sub> = 0.29 ± 0.03 μM<br/> BACE-1 %Inhibition (10 μM) = 12 ± 2 </p> |  <p> AChE %Inhibition (10 μM) = 35<br/> BuChE IC<sub>50</sub> = 0.15 ± 0.03 × 10<sup>-3</sup> μM<br/> BACE-1 %Inhibition (10 μM) = 20 ± 4 </p> |  <p> AChE %Inhibition (10 μM) = 37<br/> BuChE IC<sub>50</sub> = 0.26 ± 0.07 × 10<sup>-3</sup> μM<br/> BACE-1 %Inhibition (10 μM) = 11 ± 3 </p> |
| 13                                                                                                                                                                                                                   | 14                                                                                                                                                                                                                              | 15                                                                                                                                                                                                                                |
|  <p> AChE %Inhibition (10 μM) = 43<br/> BuChE IC<sub>50</sub> = 4.0 ± 0.3 μM<br/> BACE-1 %Inhibition (10 μM) = 50 ± 5 </p>        |  <p> AChE %Inhibition (10 μM) = 33<br/> BuChE IC<sub>50</sub> = 2.1 ± 0.3 μM<br/> BACE-1 %Inhibition (10 μM) = 38 ± 3 </p>                    |  <p> AChE %Inhibition (10 μM) = 43<br/> BuChE %Inhibition (10 μM) = 46<br/> BACE-1 %Inhibition (10 μM) = 50 ± 2 </p>                         |

| 17                                                                                                                                                                                                                                                                                            | 19                                                                                                                                                                                                                                                                                                                   | 20                                                                                                                                                                                                                                                                                               |
|-----------------------------------------------------------------------------------------------------------------------------------------------------------------------------------------------------------------------------------------------------------------------------------------------|----------------------------------------------------------------------------------------------------------------------------------------------------------------------------------------------------------------------------------------------------------------------------------------------------------------------|--------------------------------------------------------------------------------------------------------------------------------------------------------------------------------------------------------------------------------------------------------------------------------------------------|
| 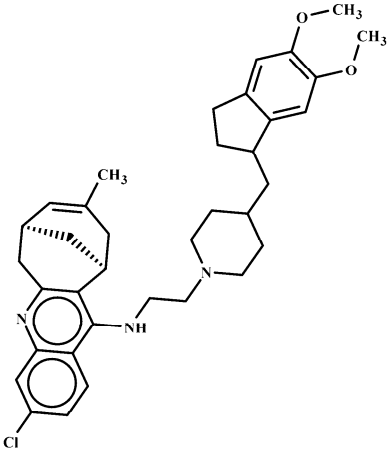 <p>hAChE IC<sub>50</sub> = 0.013 <math>\mu</math>M<br/> BuChE IC<sub>50</sub> = 0.303 <math>\pm</math> 0.012 <math>\mu</math>M<br/> BACE-1 %Inhibition (10 <math>\mu</math>M) = 24.6 <math>\pm</math> 3</p> |  <p>AChE IC<sub>50</sub> = 0.029 <math>\pm</math> 0.002 <math>\mu</math>M<br/> BuChE IC<sub>50</sub> = 0.419 <math>\pm</math> 0.017 <math>\mu</math>M<br/> BACE-1 %Inhibition (5 <math>\mu</math>M) = 12.5 <math>\pm</math> 0.7</p> |  <p>AChE IC<sub>50</sub> = 0.0004 <math>\mu</math>M<br/> BuChE IC<sub>50</sub> = 0.194 <math>\pm</math> 0.009 <math>\mu</math>M<br/> BACE-1 %Inhibition (5 <math>\mu</math>M) = 14.9 <math>\pm</math> 3.9</p> |
| 21                                                                                                                                                                                                                                                                                            | 22                                                                                                                                                                                                                                                                                                                   | 23                                                                                                                                                                                                                                                                                               |
|  <p>AChE IC<sub>50</sub> = 0.004 <math>\mu</math>M<br/> BuChE IC<sub>50</sub> = 0.247 <math>\pm</math> 0.018 <math>\mu</math>M<br/> BACE-1 %Inhibition (5 <math>\mu</math>M) = 14 <math>\pm</math> 0.1</p> |  <p>AChE IC<sub>50</sub> = 0.0003 <math>\mu</math>M<br/> BuChE IC<sub>50</sub> = 0.159 <math>\pm</math> 0.01 <math>\mu</math>M<br/> BACE-1 %Inhibition (5 <math>\mu</math>M) = 21.8 <math>\pm</math> 7.2</p>                      |  <p>AChE IC<sub>50</sub> = 0.70 <math>\mu</math>M<br/> BuChE IC<sub>50</sub> = 1.01 <math>\mu</math>M<br/> BACE-1 %Inhibition (10 <math>\mu</math>M) = 10.51 <math>\pm</math> 2.55</p>                      |

| 24                                                                                                                                                                                                                                                                               | 25                                                                                                                                                                                                                                                                                                                                         | 26                                                                                                                                                                                                                                                                                                                                           |
|----------------------------------------------------------------------------------------------------------------------------------------------------------------------------------------------------------------------------------------------------------------------------------|--------------------------------------------------------------------------------------------------------------------------------------------------------------------------------------------------------------------------------------------------------------------------------------------------------------------------------------------|----------------------------------------------------------------------------------------------------------------------------------------------------------------------------------------------------------------------------------------------------------------------------------------------------------------------------------------------|
| 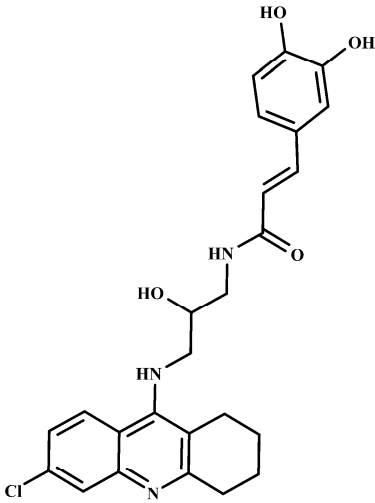 <p> AChE IC<sub>50</sub> = 0.15 <math>\mu</math>M<br/> BuChE IC<sub>50</sub> = 0.36 <math>\mu</math>M<br/> BACE-1 %Inhibition (10 <math>\mu</math>M) = 13.07<br/> <math>\pm</math> 5.81 </p>   |  <p> AChE IC<sub>50</sub> = 0.03 <math>\mu</math>M<br/> BuChE IC<sub>50</sub> = 0.31 <math>\mu</math>M<br/> BACE-1 %Inhibition (10 <math>\mu</math>M) = 14.97 <math>\pm</math><br/> 1.25 </p>                                                             |  <p> AChE IC<sub>50</sub> = 0.02 <math>\mu</math>M<br/> BuChE IC<sub>50</sub> = 0.71 <math>\mu</math>M<br/> BACE-1 %Inhibition (10 <math>\mu</math>M) = 2.57<br/> <math>\pm</math> 7.29 </p>                                                              |
| 27                                                                                                                                                                                                                                                                               | 29                                                                                                                                                                                                                                                                                                                                         | 31                                                                                                                                                                                                                                                                                                                                           |
|  <p> AChE IC<sub>50</sub> = 0.10 <math>\mu</math>M<br/> BuChE IC<sub>50</sub> = 1.18 <math>\mu</math>M<br/> BACE-1 %Inhibition (10 <math>\mu</math>M) = 24.77<br/> <math>\pm</math> 5.46 </p> |  <p> AChE %Inhibition (10 <math>\mu</math>M) = 92.05 <math>\pm</math><br/> 0.51<br/> BuChE %Inhibition (10 <math>\mu</math>M) = 21.92 <math>\pm</math><br/> 1.82<br/> BACE-1 %Inhibition (10 <math>\mu</math>M) = 43.42 <math>\pm</math><br/> 2.08 </p> |  <p> AChE %Inhibition (10 <math>\mu</math>M) = 35.62 <math>\pm</math><br/> 2.05<br/> BuChE %Inhibition (10 <math>\mu</math>M) = 10.55<br/> <math>\pm</math> 0.39<br/> BACE-1 %Inhibition (10 <math>\mu</math>M) = 20.32<br/> <math>\pm</math> 4.05 </p> |



|                                                                                                                                                                                                                                                                         |                                                                                                                                                                                                                                                                      |                                                                                                                                                                                                                                                                        |
|-------------------------------------------------------------------------------------------------------------------------------------------------------------------------------------------------------------------------------------------------------------------------|----------------------------------------------------------------------------------------------------------------------------------------------------------------------------------------------------------------------------------------------------------------------|------------------------------------------------------------------------------------------------------------------------------------------------------------------------------------------------------------------------------------------------------------------------|
| <p style="text-align: center;"><b>32</b></p> 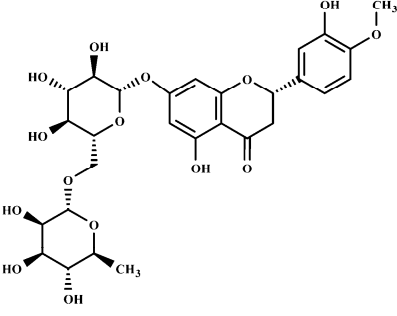 <p>AChE IC<sub>50</sub> = 22.80 ± 2.78 μM<br/> BuChE IC<sub>50</sub> = 48.09 ± 0.74 μM<br/> BACE-1 IC<sub>50</sub> = 16.99 ± 1.25 μM</p> | <p style="text-align: center;"><b>33</b></p>  <p>AChE IC<sub>50</sub> = 16.2 ± 1.0 μM<br/> BuChE IC<sub>50</sub> = 48.1 ± 0.59 μM<br/> BACE-1 IC<sub>50</sub> = 29.6 ± 3.5 μM</p>   | <p style="text-align: center;"><b>35</b></p>  <p>AChE IC<sub>50</sub> = 17.8 ± 0.62 μM<br/> BuChE IC<sub>50</sub> = 55.9 ± 5.6 μM<br/> BACE-1 IC<sub>50</sub> = 67.1 ± 7.7 μM</p>   |
| <p style="text-align: center;"><b>36</b></p>  <p>AChE IC<sub>50</sub> = 46.5 ± 3.4 μM<br/> BuChE IC<sub>50</sub> = 80.1 ± 6.8 μM<br/> BACE-1 IC<sub>50</sub> = 80.0 ± 5.9 μM</p>      | <p style="text-align: center;"><b>37</b></p>  <p>AChE IC<sub>50</sub> = 110.0 ± 3.0 μM<br/> BuChE IC<sub>50</sub> = 19.4 ± 0.22 μM<br/> BACE-1 IC<sub>50</sub> = 84.6 ± 6.0 μM</p> | <p style="text-align: center;"><b>38</b></p>  <p>AChE IC<sub>50</sub> = 39.3 ± 1.9 μM<br/> BuChE IC<sub>50</sub> = 119.0 ± 2.5 μM<br/> BACE-1 IC<sub>50</sub> = 94.4 ± 4.5 μM</p>  |
| <p style="text-align: center;"><b>39</b></p>  <p>AChE IC<sub>50</sub> = 2.55 ± 0.23 μM<br/> BuChE IC<sub>50</sub> = 62.0 ± 0.71 μM<br/> BACE-1 IC<sub>50</sub> = 18.0 ± 2.8 μM</p>   | <p style="text-align: center;"><b>41</b></p>  <p>AChE IC<sub>50</sub> = 27.4 ± 1.2 μM<br/> BuChE IC<sub>50</sub> = 19.3 ± 0.17 μM<br/> BACE-1 IC<sub>50</sub> = 10.7 ± 1.5 μM</p> | <p style="text-align: center;"><b>42</b></p>  <p>AChE IC<sub>50</sub> = 24.1 ± 1.1 μM<br/> BuChE IC<sub>50</sub> = 5.31 ± 0.19 μM<br/> BACE-1 IC<sub>50</sub> = 53.3 ± 1.2 μM</p> |

| 43                                                                                                                                                                                                                       | 45                                                                                                                                                                                                                     | 46                                                                                                                                                                                                                       |
|--------------------------------------------------------------------------------------------------------------------------------------------------------------------------------------------------------------------------|------------------------------------------------------------------------------------------------------------------------------------------------------------------------------------------------------------------------|--------------------------------------------------------------------------------------------------------------------------------------------------------------------------------------------------------------------------|
| 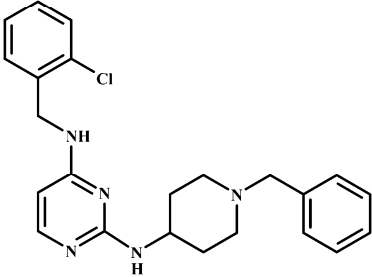 <p>AChE IC<sub>50</sub> = 7.0 ± 0.77 μM<br/>BuChE IC<sub>50</sub> = 2.40 ± 0.24 μM<br/>BACE-1 IC<sub>50</sub> = 1.70 ± 0.15 μM</p>     |  <p>AChE IC<sub>50</sub> = 8.80 ± 0.88 μM<br/>BuChE IC<sub>50</sub> = 2.80 ± 0.28 μM<br/>BACE-1 IC<sub>50</sub> = 3.20 ± 0.30 μM</p>  |  <p>AChE IC<sub>50</sub> = 7.70 ± 0.70 μM<br/>BuChE IC<sub>50</sub> = 2.20 ± 0.20 μM<br/>BACE-1 IC<sub>50</sub> = 0.70 ± 0.05 μM</p>  |
| 47                                                                                                                                                                                                                       | 48                                                                                                                                                                                                                     | 49                                                                                                                                                                                                                       |
|  <p>AChE IC<sub>50</sub> = 12.90 ± 0.12 μM<br/>BuChE IC<sub>50</sub> = 2.50 ± 0.22 μM<br/>BACE-1 IC<sub>50</sub> = 11.10 ± 0.10 μM</p> |  <p>AChE IC<sub>50</sub> = 9.40 ± 0.90 μM<br/>BuChE IC<sub>50</sub> = 4.90 ± 0.50 μM<br/>BACE-1 IC<sub>50</sub> = 0.60 ± 0.04 μM</p> |  <p>AChE IC<sub>50</sub> = 10.30 ± 0.10 μM<br/>BuChE IC<sub>50</sub> = 7.70 ± 0.65 μM<br/>BACE-1 IC<sub>50</sub> = 8.90 ± 0.90 μM</p> |
| 50                                                                                                                                                                                                                       |                                                                                                                                                                                                                        |                                                                                                                                                                                                                          |

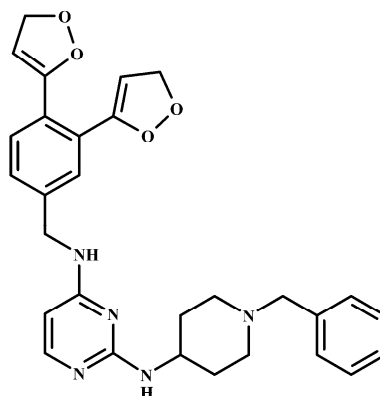

AChE IC<sub>50</sub> = 12.60 ± 0.12 μM  
BuChE IC<sub>50</sub> = 3.90 ± 0.40 μM  
BACE-1 IC<sub>50</sub> = 1.40 ± 0.13 μM
